# Supplementary material for: Evaluating the Genetic Effects of Gut Microbiota on the Development of Neuroticism and General Happiness: A Polygenic Score Analysis and Interaction Study Using UK Biobank Data
Source: Genes (Basel). 2023 Jan 6;14(1):156. doi: 10.3390/genes14010156 (PMC9858947; doi:10.3390/genes14010156)
Supplement: Supplementary file 1 [file genes-14-00156-s001.zip › Supplementary Table.xlsx]

## Sheet: Table S1
Table S1. Interactions between individual SNPs and gut microbiota for neuroticism with P < 5×10–8.
	Chromosome	Position	SNP	Gene	BETA	SE	P
G_Bifidobacterium_RNT	4	25505255	rs181360326		-16.7232	2.3	1.78119e-12
	8	47294006	rs144144322		-10.3637	1.55	7.27254e-11
	8	47423700	rs151232871		-10.0978	1.52	9.75014e-11
	5	176840318	rs71601362	GRK6	-19.43	2.94	1.10366e-10
	8	43740082	8:43740082_GCA_G		-10.1448	1.53	1.1058e-10
	8	43317576	rs2952074		-9.71108	1.48	1.687e-10
	8	46885551	rs536129750		-10.1985	1.59	3.77444e-10
	8	46889171	rs575005982		-10.1985	1.59	3.77444e-10
	5	176713284	rs138296973	NSD1	-17.8807	2.84	7.91479e-10
	5	176673938	rs71601347	NSD1	-19.417	3.1	8.63875e-10
	15	61485278	rs575949009	RORA	-45.0026	7.32	1.82033e-09
	2	206847026	rs150993761		-22.664	3.75	3.17402e-09
	8	43404273	rs117432449		-7.57566	1.28	6.85264e-09
	1	5507054	rs56118223		-15.7112	2.66	7.25394e-09
	19	56457884	rs149110932		-16.0457	2.8	1.9241e-08
	2	206996971	rs148934517	NDUFS1	-15.5967	2.78	3.7091e-08
	1	84173306	rs115547398	LINC01725	6.71484	1.2	4.19232e-08
G_Desulfovibrio_RNT	4	100938315	rs76216399	AC097460.1	-11.7208	0.0223797	1.609e-111
	9	16155596	rs729119		-7.60824	0.014959	9.32669e-111
	9	16152566	rs72712805		-7.51594	0.0155738	2.17276e-109
	9	16153842	rs72712806		-7.51594	0.0155738	2.17276e-109
	9	16162268	rs11999673		-7.48611	0.0155602	2.61697e-109
	4	100885074	rs77855620	AC097460.1	-11.6181	0.0289792	1.47188e-104
	9	16157047	rs187949054		-7.56767	0.020514	2.16402e-102
	9	16167236	rs55694526		-7.58409	0.0522822	4.22801e-78
	9	16167309	rs56268371		-7.58409	0.0522822	4.22801e-78
	9	16168996	rs72712819		-7.49273	0.0581914	5.27725e-75
	9	16171179	rs56077305		-7.59033	0.0675726	1.84239e-71
	9	16150239	rs60287822		-7.91392	0.10518	4.29547e-61
	4	100814629	rs536660311	LAMTOR3	-13.254	0.267251	2.09407e-50
	17	13617974	rs8078631		-6.22838	0.199076	7.44011e-39
	2	11161484	rs114834499		-15.4191	0.585423	1.13999e-34
	9	16150237	rs72712804		-8.46437	0.393773	7.07341e-30
	9	16205710	rs77592226	C9orf92	-7.96145	0.397041	2.77472e-28
	4	137502922	rs6845458		-14.4503	0.831363	4.2483e-25
	9	16159294	rs72712808		-7.16918	0.421466	1.25175e-24
	9	16159820	rs72712809		-7.16918	0.421466	1.25175e-24
	9	16164549	rs12004737		-7.17194	0.423404	1.5433e-24
	9	16159064	rs79716263		-7.13602	0.444375	2.14592e-23
	4	100922005	rs554479436	AC097460.1	-9.73775	0.624838	9.20309e-23
	4	100816115	rs72684365		-9.35427	0.729463	7.71763e-19
	7	124919910	rs75171178		-10.0875	0.863699	4.33358e-17
	8	16257656	rs139606891	MSR1	5.15276	0.48096	1.47451e-15
	8	142092557	rs76667636		-13.7419	1.3653	1.67085e-14
	5	162629753	rs111528704	AC113414.1	-7.71417	0.782206	3.60685e-14
	21	47468227	rs190382597		-9.04723	0.919076	3.86579e-14
	1	119853830	rs6660736	AL359915.1	-32.6074	3.36446	6.89944e-14
	1	119855151	rs6672204	AL359915.1	-32.6074	3.36446	6.89944e-14
	1	119855198	rs6663841	AL359915.1	-32.6074	3.36446	6.89944e-14
	1	119856193	rs55653769	AL359915.1	-32.6059	3.36442	6.90842e-14
	1	119852065	rs72691161	AL359915.1	-32.6082	3.36512	6.94403e-14
	1	119852242	rs56701958	AL359915.1	-32.6082	3.36512	6.94403e-14
	1	119852562	rs6656910	AL359915.1	-32.6082	3.36512	6.94403e-14
	1	119853715	rs111243452	AL359915.1	-32.6082	3.36512	6.94403e-14
	1	119854700	rs12037553	AL359915.1	-32.6082	3.36512	6.94403e-14
	1	119855505	1:119855505_TTC_T		-32.5709	3.3614	6.95321e-14
	1	119857256	rs12029989	AL359915.1	-32.6061	3.3655	6.98945e-14
	1	119851063	rs12038914	AL359915.1	-32.609	3.3658	6.98981e-14
	1	119858517	rs7514708	AL359915.1	-32.607	3.36691	7.09087e-14
	1	119858827	rs112087115	AL359915.1	-32.6071	3.36729	7.12015e-14
	1	119849145	rs72691158	AL359915.1	-32.6113	3.36783	7.12801e-14
	1	119849214	rs6658706	AL359915.1	-32.6113	3.36783	7.12801e-14
	1	119842842	rs72691149	AL359915.1	-32.6137	3.36989	7.2715e-14
	1	119848701	rs12036875	AL359915.1	-32.6137	3.36989	7.2715e-14
	1	119838384	rs17023394	AL359915.1	-32.6031	3.37039	7.40008e-14
	1	119850743	rs12028385	AL359915.1	-32.5502	3.37274	8.06144e-14
	17	66228426	rs7222897		-6.54121	0.691494	1.67772e-13
	12	27801712	rs7970429	PPFIBP1	-3.42847	0.369196	3.26536e-13
	5	6136423	rs80114860	AC026797.1	-9.30719	1.03093	8.85717e-13
	19	9263381	rs13382022	ZNF317	-12.9556	1.44043	1.00936e-12
	19	9264603	rs62103616	ZNF317	-12.9556	1.44043	1.00936e-12
	19	9250214	rs761337434		-12.8832	1.44285	1.29996e-12
	1	84161494	rs113514145	LINC01725	-12.9781	1.45982	1.51073e-12
	5	6127235	5:6127235_AC_A		-9.38525	1.06256	1.88912e-12
	1	119845748	rs72691153		-30.5291	3.45922	1.94345e-12
	1	119843852	rs12037207		-30.5282	3.45999	1.96045e-12
	4	36546968	rs10213327	LINC02505	-18.8212	2.14325	2.30434e-12
	5	117532919	rs77007993	LINC02147	28.8416	3.30405	2.8262e-12
	4	103870091	rs13137892	SLC9B1	-10.698	1.22779	3.00714e-12
	4	103872021	rs13152518	SLC9B1	-10.698	1.22779	3.00714e-12
	4	103885330	rs71597138	SLC9B1	-10.698	1.22779	3.00714e-12
	4	103903209	rs4525980	SLC9B1	-10.698	1.22779	3.00714e-12
	4	103922109	rs13133907	SLC9B1	-10.698	1.22779	3.00714e-12
	4	103926052	rs72665008	SLC9B1	-10.698	1.22779	3.00714e-12
	4	103966802	rs66819851	SLC9B2	-10.698	1.22779	3.00714e-12
	4	103749792	rs66859883	UBE2D3	-9.77712	1.12234	3.02868e-12
	17	1313985	rs768003812		-2.35981	0.271539	3.28536e-12
	9	16194512	rs72712836		-6.27438	0.724817	3.7508e-12
	17	66232343	rs781873541		-6.43793	0.745378	4.045e-12
	3	75861584	rs62266840		-9.4749	1.12423	9.15591e-12
	5	162646247	rs74923732	AC113414.1	-6.37433	0.758221	9.93879e-12
	5	162633647	rs115854981	AC113414.1	-6.37159	0.758075	1.00169e-11
	5	162639407	rs112595045	AC113414.1	-6.37159	0.758075	1.00169e-11
	5	162647465	rs17061325	AC113414.1	-6.37159	0.758075	1.00169e-11
	14	100030018	rs72706331	CCDC85C	-12.0044	1.43235	1.1002e-11
	7	65197120	7:65197120_TGG_T		-25.4585	3.0397	1.12483e-11
	4	103668899	rs34992678	MANBA	-9.24677	1.10562	1.1784e-11
	4	103672369	rs17175769	MANBA	-9.24677	1.10562	1.1784e-11
	3	75902909	rs12495143		-13.3347	1.59882	1.29e-11
	4	103609521	4:103609521_TTC_T		-9.2337	1.10932	1.37625e-11
	3	75912373	rs6787574		-13.164	1.58265	1.40941e-11
	3	75913892	rs59258721		-13.1603	1.5843	1.47146e-11
	3	75863514	rs62266842		-13.0417	1.57531	1.64138e-11
	1	84146671	rs12098061	LINC01725	-12.0181	1.47565	2.78192e-11
	4	36544049	rs2375983	LINC02505	-19.012	2.34658	3.28282e-11
	4	36545448	rs28437368	LINC02505	-19.012	2.34658	3.28282e-11
	4	36546041	rs12507648	LINC02505	-19.012	2.34658	3.28282e-11
	4	36546727	rs113580199	LINC02505	-19.012	2.34658	3.28282e-11
	12	130948406	rs4759689	RIMBP2	-5.15249	0.641478	4.3177e-11
	2	238811902	rs11675777	RAMP1	-7.73368	0.97591	6.59042e-11
	19	8309242	rs2967620	CERS4	-7.55063	0.971884	1.21468e-10
	19	8309844	rs28546979	CERS4	-7.55106	0.972197	1.22454e-10
	9	81985509	rs558728379		6.83813	0.880497	1.22837e-10
	2	165901735	rs75957308	AC019197.1	-21.5319	2.82338	2.13012e-10
	12	27805574	rs12582113	PPFIBP1	-2.97461	0.393634	2.8003e-10
	1	65446237	rs199793278	LINC01359	-13.5091	1.79114	2.96595e-10
	7	65730536	rs534752029	TPST1	-15.9	2.15072	5.33726e-10
	15	80736044	rs75005049	ARNT2	-6.40157	0.874742	7.15962e-10
	15	80736682	rs79968897	ARNT2	-6.40157	0.874742	7.15962e-10
	15	80737333	rs192564221	ARNT2	-6.40157	0.874742	7.15962e-10
	15	80737562	rs116625660	ARNT2	-6.40157	0.874742	7.15962e-10
	15	80738013	rs79285910	ARNT2	-6.40157	0.874742	7.15962e-10
	15	80739903	rs16972139	ARNT2	-6.40157	0.874742	7.15962e-10
	15	80739984	rs78379590	ARNT2	-6.40157	0.874742	7.15962e-10
	15	80744972	rs16972145	ARNT2	-6.40303	0.875051	7.18549e-10
	15	80751064	rs76958776	ARNT2	-6.40542	0.875676	7.25634e-10
	15	80751382	rs80227900	ARNT2	-6.40542	0.875676	7.25634e-10
	14	100018722	rs8008699	CCDC85C	-12.9387	1.76892	7.26659e-10
	15	80753850	rs79918360	ARNT2	-6.40752	0.876784	7.45446e-10
	15	80754450	rs75468941	ARNT2	-6.40788	0.877097	7.51912e-10
	15	80756391	rs79131972	ARNT2	-6.40591	0.87917	8.11777e-10
	13	28611186	rs17086239	FLT3	-4.93608	0.678665	8.54669e-10
	13	28611221	rs17086242	FLT3	-4.93608	0.678665	8.54669e-10
	4	104227166	rs72668635	LINC02428	-8.47016	1.16471	8.57599e-10
	2	151769380	rs62167115		-9.72883	1.34071	9.12848e-10
	14	31224394	rs75281632	AL121852.1	-11.9769	1.65399	9.69375e-10
	17	1335770	17:1335770_TAAAAAAAAAA_T		-3.12866	0.435683	1.22808e-09
	10	110960117	rs75242229		-6.32625	0.882256	1.27992e-09
	1	228051234	rs2313202		-8.01977	1.1239	1.46784e-09
	16	1128064	rs144155697	SSTR5-AS1	-8.07364	1.13512	1.60729e-09
	1	228028138	rs113973434	PRSS38	-6.91959	0.974439	1.6816e-09
	3	75953242	rs62269781		-10.2714	1.45555	2.00178e-09
	2	70811183	rs72912171		-5.81843	0.824899	2.02738e-09
	5	51666345	rs72762653		-6.76208	0.964173	2.37386e-09
	18	28248317	rs11662239		-9.15781	1.31253	2.73584e-09
	1	228015323	rs76725378	PRSS38	-6.84663	0.981635	2.76251e-09
	1	228029955	rs12129350	PRSS38	-6.84626	0.982369	2.82391e-09
	1	228030498	rs12132845	PRSS38	-6.84626	0.982369	2.82391e-09
	1	228032959	rs17555729	PRSS38	-6.84626	0.982369	2.82391e-09
	1	228037569	rs73102861		-6.84626	0.982369	2.82391e-09
	1	228038151	rs57935191		-6.84626	0.982369	2.82391e-09
	1	228039792	rs12136750		-6.84626	0.982369	2.82391e-09
	1	228036896	rs10916225		-6.84711	0.98257	2.83003e-09
	2	52912242	rs350796		-13.7277	1.98406	3.43837e-09
	12	27801936	rs6487627	PPFIBP1	-3.09933	0.449024	3.66965e-09
	16	62182489	rs137861213		-6.0644	0.880344	3.87221e-09
	2	40177693	rs141440011	SLC8A1-AS1	-5.61669	0.82775	5.80224e-09
	4	103986512	4:103986512_TAACAGTG_T		-8.55831	1.26902	6.82514e-09
	2	40173796	rs77617726	SLC8A1-AS1	-5.59791	0.830445	6.91047e-09
	2	40167768	rs77519790	SLC8A1-AS1	-5.60097	0.830922	6.91539e-09
	2	40169465	rs2024416	SLC8A1-AS1	-5.60097	0.830922	6.91539e-09
	2	40178760	rs76724186	SLC8A1-AS1	-5.59754	0.830473	6.9286e-09
	2	40168497	rs78766443	SLC8A1-AS1	-5.60024	0.830976	6.95143e-09
	2	40181902	rs35816221	SLC8A1-AS1	-5.59641	0.83045	6.96047e-09
	7	67192928	rs4634519		-2.59403	0.385135	7.0598e-09
	7	67194407	rs35055624		-2.59381	0.385222	7.11833e-09
	7	67194578	rs10273223		-2.59381	0.385222	7.11833e-09
	7	67196181	rs34588763		-2.59319	0.385377	7.2395e-09
	10	110970830	rs78410117		-6.27443	0.934256	7.61752e-09
	16	62165986	rs117764708		-6.02174	0.89777	7.87563e-09
	5	91546857	5:91546857_TATAC_T		-13.7147	2.05192	8.63863e-09
	12	27824690	rs34982186	PPFIBP1	-2.79955	0.421266	1.00319e-08
	8	81832965	rs75865835		-6.83992	1.03119	1.05362e-08
	12	27822947	rs2113875	PPFIBP1	-2.79672	0.4219	1.07087e-08
	2	70818849	rs113882781		-8.0613	1.2241	1.26866e-08
	12	27822120	rs4931247	PPFIBP1	-2.78249	0.424014	1.389e-08
	6	74200989	6:74200989_GA_G		-10.1729	1.55273	1.44775e-08
	4	149276949	rs1512332	NR3C2	-13.5873	2.07642	1.49386e-08
	4	149281234	rs80291135	NR3C2	-13.5873	2.07642	1.49386e-08
	4	149300784	rs17024666	NR3C2	-13.5866	2.0764	1.49536e-08
	4	149304848	rs11730006	NR3C2	-13.5861	2.07634	1.49584e-08
	4	149334558	rs878152	NR3C2	-13.5948	2.07824	1.50633e-08
	4	149343376	rs17024715	NR3C2	-13.6052	2.08019	1.51283e-08
	4	149341861	rs12509783	NR3C2	-13.6048	2.08021	1.51437e-08
	8	81829468	rs77138547		-6.74628	1.03181	1.52498e-08
	12	27802490	rs34594391	PPFIBP1	-2.84011	0.438447	1.93184e-08
	12	27818644	rs7974209	PPFIBP1	-2.76092	0.428039	2.15038e-08
	12	27819562	rs4931235	PPFIBP1	-2.76092	0.428039	2.15038e-08
	1	24523112	rs78162823		-11.7719	1.82636	2.18927e-08
	4	170223994	4:170223994_CCCT_C		-8.90817	1.38258	2.20981e-08
	4	170227995	rs7377412		-8.89469	1.38461	2.38092e-08
	8	133462974	rs72721081	KCNQ3	-14.8022	2.30815	2.48464e-08
	8	133463384	rs62520397	KCNQ3	-14.7975	2.31011	2.5581e-08
	8	133461476	rs58613338	KCNQ3	-14.789	2.31091	2.61728e-08
	12	27825168	rs12826974	PPFIBP1	-2.74654	0.429356	2.64571e-08
	1	228025264	rs61827004	PRSS38	-6.02572	0.943002	2.71825e-08
	4	78079772	rs4150052	CCNG2	-9.7541	1.52678	2.73168e-08
	3	136823132	rs56087415		-2.62513	0.411104	2.76483e-08
	1	228016826	rs28660431	PRSS38	-6.02558	0.943661	2.76737e-08
	1	228017395	rs4622126	PRSS38	-6.02558	0.943661	2.76737e-08
	3	136829968	rs7642062		-2.62488	0.411139	2.77705e-08
	3	136838293	rs6783472		-2.62488	0.411139	2.77705e-08
	3	136818041	rs7643406		-2.62481	0.411136	2.77862e-08
	3	136828918	rs62408931		-2.62481	0.411136	2.77862e-08
	3	136834462	rs7628202		-2.62481	0.411136	2.77862e-08
	3	136834820	rs62408935		-2.62481	0.411136	2.77862e-08
	3	136839680	rs62408938		-2.62481	0.411136	2.77862e-08
	3	136840700	rs62408939		-2.62481	0.411136	2.77862e-08
	3	136841721	rs10935223		-2.62481	0.411136	2.77862e-08
	2	154460586	rs1519647		-9.00406	1.41154	2.83754e-08
	4	78084904	rs4150084	CCNG2	-9.73687	1.52682	2.85585e-08
	4	78085963	rs4150090	CCNG2	-9.7319	1.52677	2.89013e-08
	4	78089459	rs34820788	CCNG2	-9.6975	1.52638	3.13436e-08
	4	78092583	rs71609303	CCNG2	-9.64795	1.52569	3.51632e-08
	19	9274642	rs62103639		-14.9915	2.37356	3.62202e-08
	18	56874674	rs78202596		-8.6132	1.36393	3.6369e-08
	18	56874399	rs57758878		-8.60435	1.36267	3.64595e-08
	14	41476257	rs12882560		-6.71881	1.06467	3.69813e-08
	14	41483707	rs12886247		-6.71789	1.06466	3.70948e-08
	14	41498940	rs12880177		-6.71789	1.06466	3.70948e-08
	14	41483101	rs12883859		-6.71605	1.06446	3.71771e-08
	14	41470616	rs11627809		-6.71655	1.06462	3.72422e-08
	14	41470661	rs11623232		-6.71655	1.06462	3.72422e-08
	14	41472862	rs12881356		-6.71655	1.06462	3.72422e-08
	14	41473961	rs11157179		-6.71655	1.06462	3.72422e-08
	14	41474481	rs12891740		-6.71655	1.06462	3.72422e-08
	14	41475312	rs1959948		-6.71655	1.06462	3.72422e-08
	14	41475499	rs1959949		-6.71655	1.06462	3.72422e-08
	14	41476428	rs12883988		-6.71655	1.06462	3.72422e-08
	14	41476821	rs12883761		-6.71655	1.06462	3.72422e-08
	14	41477402	rs12889833		-6.71655	1.06462	3.72422e-08
	14	41477447	rs12888498		-6.71655	1.06462	3.72422e-08
	14	41477558	rs8015182		-6.71655	1.06462	3.72422e-08
	14	41477588	rs8014007		-6.71655	1.06462	3.72422e-08
	14	41479697	rs12588824		-6.71655	1.06462	3.72422e-08
	14	41483267	rs12884161		-6.71655	1.06462	3.72422e-08
	14	41483953	rs12885266		-6.71655	1.06462	3.72422e-08
	14	41485199	14:41485199_AT_A		-6.71655	1.06462	3.72422e-08
	14	41485637	14:41485637_GGAGAGGGA_G		-6.71655	1.06462	3.72422e-08
	14	41486853	rs1002734		-6.71655	1.06462	3.72422e-08
	14	41487090	rs12886485		-6.71655	1.06462	3.72422e-08
	14	41488147	rs4396446		-6.71655	1.06462	3.72422e-08
	14	41488219	rs3985198		-6.71655	1.06462	3.72422e-08
	14	41488251	rs3985199		-6.71655	1.06462	3.72422e-08
	14	41488493	rs2123091		-6.71655	1.06462	3.72422e-08
	14	41488850	rs12893621		-6.71655	1.06462	3.72422e-08
	14	41490620	rs12894782		-6.71655	1.06462	3.72422e-08
	14	41491095	rs11625665		-6.71655	1.06462	3.72422e-08
	14	41491464	rs1901474		-6.71655	1.06462	3.72422e-08
	14	41495543	rs11626128		-6.71655	1.06462	3.72422e-08
	14	41495621	rs11626131		-6.71655	1.06462	3.72422e-08
	14	41496527	rs12889656		-6.71655	1.06462	3.72422e-08
	14	41497534	14:41497534_TG_T		-6.71655	1.06462	3.72422e-08
	14	41497540	rs59756307		-6.71655	1.06462	3.72422e-08
	14	41499391	rs2211545		-6.71655	1.06462	3.72422e-08
	14	41499839	rs12885616		-6.71655	1.06462	3.72422e-08
	14	41500935	rs12882031		-6.71655	1.06462	3.72422e-08
	14	41503101	rs2211547		-6.71655	1.06462	3.72422e-08
	14	41504724	rs12883901		-6.71655	1.06462	3.72422e-08
	14	41508785	rs10400764		-6.71655	1.06462	3.72422e-08
	3	136823172	3:136823172_GAAA_G		-2.63485	0.41772	3.74128e-08
	14	41511113	rs1959937		-6.71317	1.06489	3.79436e-08
	14	41490269	rs12894514		-6.70944	1.06544	3.89509e-08
	4	103783049	rs67236825	UBE2D3	-8.26193	1.31272	3.94963e-08
	7	97118498	rs62496828		-8.9008	1.42029	4.383e-08
	7	65481608	rs146796519		-7.66926	1.22799	4.76421e-08
Note: SNP, single-nucleotide polymorphism; G, genus; RNT, rank-normal transformation; SE, standard error.

## Sheet: Table S2
Table S2. Interactions between individual SNPs and gut microbiota for general happiness with P < 5×10–8.
	Chromosome	Position	SNP	Gene	BETA	SE	P
G_Bifidobacterium_HB	8	26750091	rs116029512		-8.77748	1.24282	4.13368e-11
	8	26766707	rs78930504		-8.77748	1.24282	4.13368e-11
	8	26738631	rs78970579		-8.78049	1.24408	4.24423e-11
	8	26732196	rs11782056		-8.78823	1.24678	4.46256e-11
	8	26790478	8:26790478_GA_G		-8.7744	1.24594	4.62297e-11
	8	26731691	rs57875649		-8.79468	1.2497	4.75118e-11
	12	98414496	rs111339777		-13.4708	1.94912	9.52791e-11
	5	150051958	rs194134	MYOZ3	43.1223	6.51817	4.73658e-10
	5	150096914	rs252157	DCTN4	41.9544	6.46388	9.23228e-10
	5	150119753	rs4958806	DCTN4	41.8727	6.51902	1.31907e-09
	12	117008369	rs145234736	MAP1LC3B2	-15.8018	2.57829	6.10562e-09
	1	192225342	rs75217519	AL390957.1	14.5054	2.43397	1.44538e-08
	1	192295467	rs76032189	RGS21	14.2957	2.41017	1.66582e-08
	1	192280455	rs12145588	AL390957.1	14.5486	2.45615	1.73523e-08
	1	192272062	rs78652093	AL390957.1	14.609	2.47076	1.82984e-08
	16	58313948	rs17241091	PRSS54	-11.5843	1.97669	2.37812e-08
	5	166176342	rs114356534		-30.3115	5.25385	3.74136e-08
G_Clostridium_sensu_stricto_RNT	13	81282601	rs58287088		8.52345	0.105669	1.16103e-27
	2	153402917	rs2577175	FMNL2	7.78126	0.23775	1.66244e-19
	9	113328608	rs112682157	SVEP1	12.8806	0.416577	5.35947e-19
	3	172477360	rs6445087	ECT2	14.6854	0.508363	2.16566e-18
	3	172514294	rs10804849	ECT2	14.6854	0.508363	2.16566e-18
	3	172527977	rs11714381	ECT2	14.7591	0.512433	2.30165e-18
	14	100649280	rs7493826		10.3004	0.452225	2.74419e-16
	17	30618536	rs12939007	RHBDL3	8.90578	0.394871	3.34923e-16
	14	100649906	rs12590066		10.6981	0.571102	1.38334e-14
	9	113328628	rs146399549	SVEP1	13.4712	0.770037	5.3539e-14
	18	49493280	rs56870531		10.1553	0.611471	1.48663e-13
	18	49494995	rs186529010		10.1663	0.615824	1.67212e-13
	18	49510260	rs9946338		10.2698	0.652336	4.2196e-13
	18	49497039	rs9967024		10.2921	0.659414	4.98821e-13
	20	57619428	rs13039746		6.93714	0.513659	7.99694e-12
	20	57623551	rs890632		6.93714	0.513659	7.99694e-12
	4	3774241	rs6605359		10.942	0.91822	8.28114e-11
	1	209804095	rs4844863	LAMB3	10.8643	1.00198	4.61218e-10
	1	7514589	rs1193245	CAMTA1	9.60001	0.918008	8.80253e-10
	6	7812351	6:7812351_AT_A		7.60308	0.74384	1.31853e-09
	3	123598662	rs2682226	MYLK	13.6865	1.34045	1.3438e-09
	3	123611437	rs4678066		13.685	1.34688	1.46484e-09
	3	123625045	rs2700369	CCDC14	13.6716	1.35783	1.71812e-09
	6	135008479	6:135008479_TTA_T		7.26486	0.72356	1.80515e-09
	3	123642636	rs2700388	CCDC14	13.6863	1.37034	1.98011e-09
	3	123683844	rs7633408		13.6871	1.37048	1.98166e-09
	6	7818125	rs12198539	BMP6	7.55216	0.756192	1.98175e-09
	3	123582141	rs2700402	MYLK	13.6126	1.4181	3.94647e-09
	3	123582450	rs9682818	MYLK	13.6126	1.4181	3.94647e-09
	3	123575722	rs6773352	MYLK	13.6109	1.41793	3.94684e-09
	3	123541066	rs4678064	MYLK	13.6101	1.41787	3.94775e-09
	3	123542807	rs13323707	MYLK	13.6101	1.41787	3.94775e-09
	3	123542869	rs13320659	MYLK	13.6101	1.41787	3.94775e-09
	3	123543619	rs7613757	MYLK	13.6101	1.41787	3.94775e-09
	3	123544576	rs2682215	MYLK	13.6101	1.41787	3.94775e-09
	3	123546733	rs2700346	MYLK	13.6101	1.41787	3.94775e-09
	3	123547433	rs2700348	MYLK	13.6101	1.41787	3.94775e-09
	3	123549230	rs2700349	MYLK	13.6101	1.41787	3.94775e-09
	3	123549237	rs2682214	MYLK	13.6101	1.41787	3.94775e-09
	3	123549395	rs2605417	MYLK	13.6101	1.41787	3.94775e-09
	3	123550111	rs2605418	MYLK	13.6101	1.41787	3.94775e-09
	3	123550170	rs2700350	MYLK	13.6101	1.41787	3.94775e-09
	3	123550202	rs2682213	MYLK	13.6101	1.41787	3.94775e-09
	3	123550463	rs2700352	MYLK	13.6101	1.41787	3.94775e-09
	3	123551177	rs2682212	MYLK	13.6101	1.41787	3.94775e-09
	3	123551309	rs2700353	MYLK	13.6101	1.41787	3.94775e-09
	3	123551772	rs2700354	MYLK	13.6101	1.41787	3.94775e-09
	3	123552138	rs2682211	MYLK	13.6101	1.41787	3.94775e-09
	3	123552372	3:123552372_GC_G		13.6102	1.41788	3.94775e-09
	3	123552800	rs2682210	MYLK	13.6101	1.41787	3.94775e-09
	3	123552964	rs2700355	MYLK	13.6101	1.41787	3.94775e-09
	3	123553076	rs2700356	MYLK	13.6101	1.41787	3.94775e-09
	3	123553142	rs2682209	MYLK	13.6101	1.41787	3.94775e-09
	3	123553630	rs2682208	MYLK	13.6101	1.41787	3.94775e-09
	3	123554867	rs2682207	MYLK	13.6101	1.41787	3.94775e-09
	3	123555676	rs2682206	MYLK	13.6101	1.41787	3.94775e-09
	3	123556464	rs2682204	MYLK	13.6101	1.41787	3.94775e-09
	3	123556479	rs2700358	MYLK	13.6101	1.41787	3.94775e-09
	3	123557081	rs2682203	MYLK	13.6101	1.41787	3.94775e-09
	3	123557360	rs2682202	MYLK	13.6101	1.41787	3.94775e-09
	3	123557812	rs1920209	MYLK	13.6101	1.41787	3.94775e-09
	3	123558138	rs2700360	MYLK	13.6101	1.41787	3.94775e-09
	3	123558289	rs2682201	MYLK	13.6101	1.41787	3.94775e-09
	3	123558705	rs2682200	MYLK	13.6101	1.41787	3.94775e-09
	3	123559217	rs772333008		13.6102	1.41788	3.94775e-09
	3	123559729	rs2682239	MYLK	13.6101	1.41787	3.94775e-09
	3	123561448	3:123561448_CA_C		13.6102	1.41788	3.94775e-09
	3	123563068	rs2249898	MYLK	13.6101	1.41787	3.94775e-09
	3	123563429	rs11413575	MYLK	13.6102	1.41788	3.94775e-09
	3	123563456	rs1920211	MYLK	13.6101	1.41787	3.94775e-09
	3	123564698	rs7634556	MYLK	13.6101	1.41787	3.94775e-09
	3	123564818	rs7634655	MYLK	13.6101	1.41787	3.94775e-09
	3	123565063	rs13094803	MYLK	13.6101	1.41787	3.94775e-09
	3	123566172	rs4461370	MYLK	13.6101	1.41787	3.94775e-09
	3	123566341	rs2700396	MYLK	13.6101	1.41787	3.94775e-09
	3	123566719	rs2700397	MYLK	13.6101	1.41787	3.94775e-09
	3	123568458	rs7646900	MYLK	13.6101	1.41787	3.94775e-09
	3	123569841	rs2700398	MYLK	13.6101	1.41787	3.94775e-09
	3	123570628	rs7653391	MYLK	13.6101	1.41787	3.94775e-09
	3	123571184	rs7639429	MYLK	13.6101	1.41787	3.94775e-09
	3	123573652	rs2682257	MYLK	13.6101	1.41787	3.94775e-09
	3	123576498	rs13318646	MYLK	13.6101	1.41787	3.94775e-09
	3	123579706	rs4383452	MYLK	13.6101	1.41787	3.94775e-09
	3	123580222	rs13067944	MYLK	13.6101	1.41787	3.94775e-09
	3	123583879	rs2682218	MYLK	13.6101	1.41787	3.94775e-09
	3	123584041	rs2682219	MYLK	13.6101	1.41787	3.94775e-09
	3	123584231	rs4118366	MYLK	13.6101	1.41787	3.94775e-09
	3	123584768	rs2682221	MYLK	13.6101	1.41787	3.94775e-09
	3	123590043	rs2700404	MYLK	13.6101	1.41787	3.94775e-09
	3	123590573	rs2700405	MYLK	13.6101	1.41787	3.94775e-09
	3	123592815	rs2682223	MYLK	13.6099	1.41809	3.95931e-09
	3	123595532	rs2682224	MYLK	13.609	1.41897	4.00656e-09
	3	123559768	3:123559768_CAA_C		13.6611	1.42452	4.01204e-09
	3	123570387	rs770276928		13.6269	1.42104	4.01616e-09
	3	18627969	rs62238582	SATB1-AS1	13.4564	1.42616	5.30683e-09
	3	18623942	rs62238581	SATB1-AS1	13.4527	1.42582	5.31043e-09
	3	18623080	rs11711881	SATB1-AS1	13.3716	1.4205	5.52563e-09
	3	18623123	rs11707806	SATB1-AS1	13.3716	1.4205	5.52563e-09
	13	81222163	13:81222163_TATGCATATATATATGC_T		9.65091	1.05146	8.50179e-09
	8	29157411	8:29157411_CGG_C		21.1167	2.35946	1.30272e-08
	6	19431583	rs7765596	AL022068.1	2.9829	0.337527	1.61016e-08
	3	18619549	rs4973714	SATB1-AS1	13.0888	1.50532	2.11191e-08
	1	161885352	rs2341479	ATF6	8.28199	0.963122	2.53854e-08
	10	20769703	rs142016264		9.5929	1.11845	2.64937e-08
	6	19396177	rs9460347	AL022068.1	2.93347	0.345088	3.07016e-08
	6	19397816	rs2201589	AL022068.1	2.93347	0.345088	3.07016e-08
	6	19398333	rs10946315	AL022068.1	2.93347	0.345088	3.07016e-08
	6	19399401	rs6917862	AL022068.1	2.93347	0.345088	3.07016e-08
	6	19386230	rs1495980	AL022068.1	2.93245	0.345403	3.13461e-08
	6	19418123	rs6905315	AL022068.1	2.93245	0.345403	3.13461e-08
	2	16154226	rs13419529	AC010145.1	9.48119	1.11779	3.18267e-08
	9	119853851	rs36005728	ASTN2	19.1531	2.26584	3.36771e-08
	9	119870818	9:119870818_CA_C		19.1627	2.27025	3.44859e-08
	3	26453931	rs562679632		9.51581	1.12833	3.49775e-08
	9	119876458	rs71495199	ASTN2	19.1712	2.27495	3.54199e-08
	1	161898418	rs4657123	ATF6	6.81436	0.812406	3.8233e-08
	1	161922365	rs2880055	ATF6	10.6203	1.27144	4.09316e-08
	9	119858178	rs13301858	ASTN2	18.7957	2.25781	4.32597e-08
	4	130245233	rs4334769		6.99499	0.84101	4.38907e-08
	9	119861727	rs17308701	ASTN2	18.7911	2.25973	4.40411e-08
	9	119861956	rs36030096	ASTN2	18.7911	2.25973	4.40411e-08
	9	119865765	rs13297784	ASTN2	18.7868	2.25976	4.42127e-08
	9	119862675	rs4086829	ASTN2	18.7867	2.2599	4.42631e-08
	9	119868868	rs35531960	ASTN2	18.7816	2.26168	4.50342e-08
	9	119870132	rs71495198	ASTN2	18.7773	2.26178	4.52356e-08
	9	119870462	rs35147155	ASTN2	18.7773	2.26178	4.52356e-08
	9	119874181	rs13292656	ASTN2	18.7731	2.26181	4.54101e-08
	9	119872587	rs13285598	ASTN2	18.7731	2.26186	4.54288e-08
	9	119876404	rs35105267	ASTN2	18.7687	2.26293	4.59557e-08
	9	119881602	rs34499290	ASTN2	18.7394	2.2677	4.87812e-08
Note: SNP, single-nucleotide polymorphism; G, genus; RNT, rank-normal transformation; HB, hurdle binary; SE, standard error.

## Sheet: Table S3
Table S3. List of neuroticism-associated GO terms.
	Term ID	Term description	P
G_Bifidobacterium_RNT	GO:0045893	positive regulation of transcription, DNA-templated	0.0011879
	GO:0000978	RNA polymerase II cis-regulatory region sequence-specific DNA binding	0.00164661
	GO:0006355	regulation of transcription, DNA-templated	0.00227561
	GO:0008270	zinc ion binding	0.00255605
	GO:0005515	protein binding	0.0081208
G_Desulfovibrio_RNT	GO:0005886	plasma membrane	9.13788e-06
	GO:0043235	receptor complex	0.000116002
	GO:0006464	cellular protein modification process	0.00066084
	GO:0005887	integral component of plasma membrane	0.00316602
	GO:0010008	endosome membrane	0.00458758
	GO:0005515	protein binding	0.00611143
	GO:0044877	protein-containing complex binding	0.0110932
	GO:0005925	focal adhesion	0.0155974
	GO:0045202	synapse	0.015738
	GO:0043312	neutrophil degranulation	0.0203649
	GO:0008284	positive regulation of cell population proliferation	0.0218845
	GO:1990837	sequence-specific double-stranded DNA binding	0.0262774
	GO:0009986	cell surface	0.0303456
	GO:0003700	DNA-binding transcription factor activity	0.031188
	GO:0006355	regulation of transcription, DNA-templated	0.0483214
Note: GO, gene ontology; G, genus; RNT, rank-normal transformation.

## Sheet: Table S4
Table S4. List of general happiness-associated GO terms.
	Term ID	Term description	P
G_Clostridium_sensu_stricto_RNT	GO:0001654	eye development	7.02092e-05
	GO:0032154	cleavage furrow	0.000109031
	GO:0008544	epidermis development	0.000234192
	GO:0045666	positive regulation of neuron differentiation	0.000245752
	GO:0005938	cell cortex	0.000719209
	GO:0005509	calcium ion binding	0.000823411
	GO:0016477	cell migration	0.00187825
	GO:0046982	protein heterodimerization activity	0.00303916
	GO:0015031	protein transport	0.00351318
	GO:0045944	positive regulation of transcription by RNA polymerase II	0.00357221
	GO:0043065	positive regulation of apoptotic process	0.00383984
	GO:0043565	sequence-specific DNA binding	0.00554393
	GO:0005737	cytoplasm	0.00568543
	GO:0005829	cytosol	0.00864497
Note: GO, gene ontology; G, genus; RNT, rank-normal transformation.
